# Supplementary material for: Short De-Etiolation Increases the Rooting of VC801 Avocado Rootstock
Source: MDPI journal article supplement (doi:10.3390/plants9111481), 2020-11-03
Supplement: s1 [file s1]

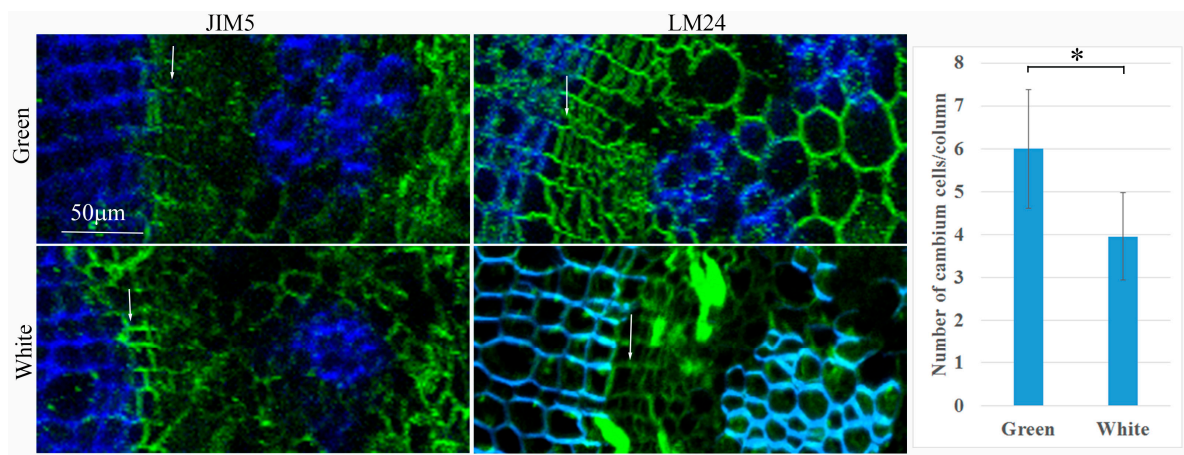

Figure S1.
